# Supplementary material
Source: PubMed Central journal article supplement (PMC2919973)

# Supplementary figures

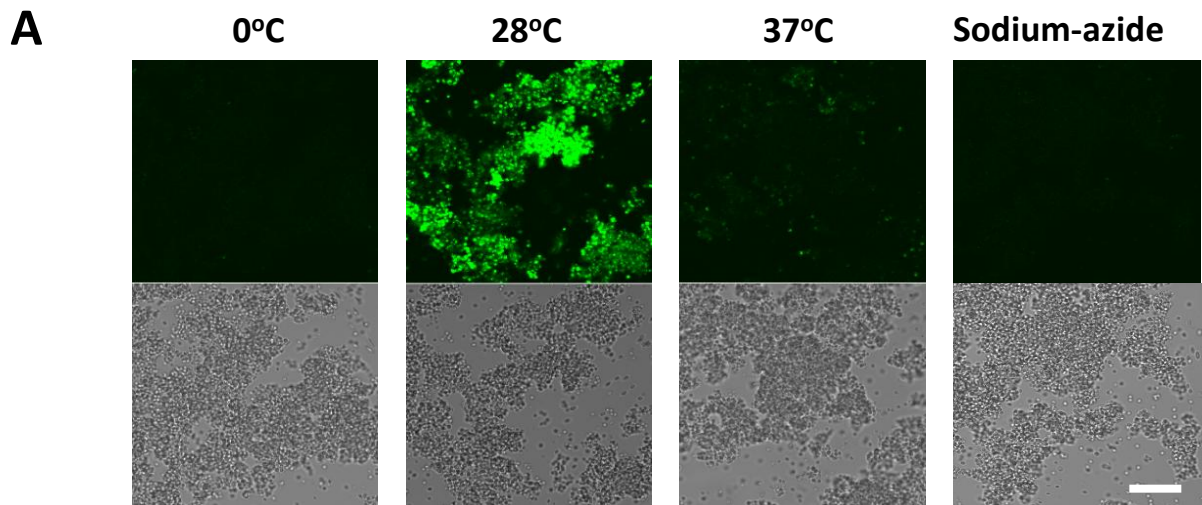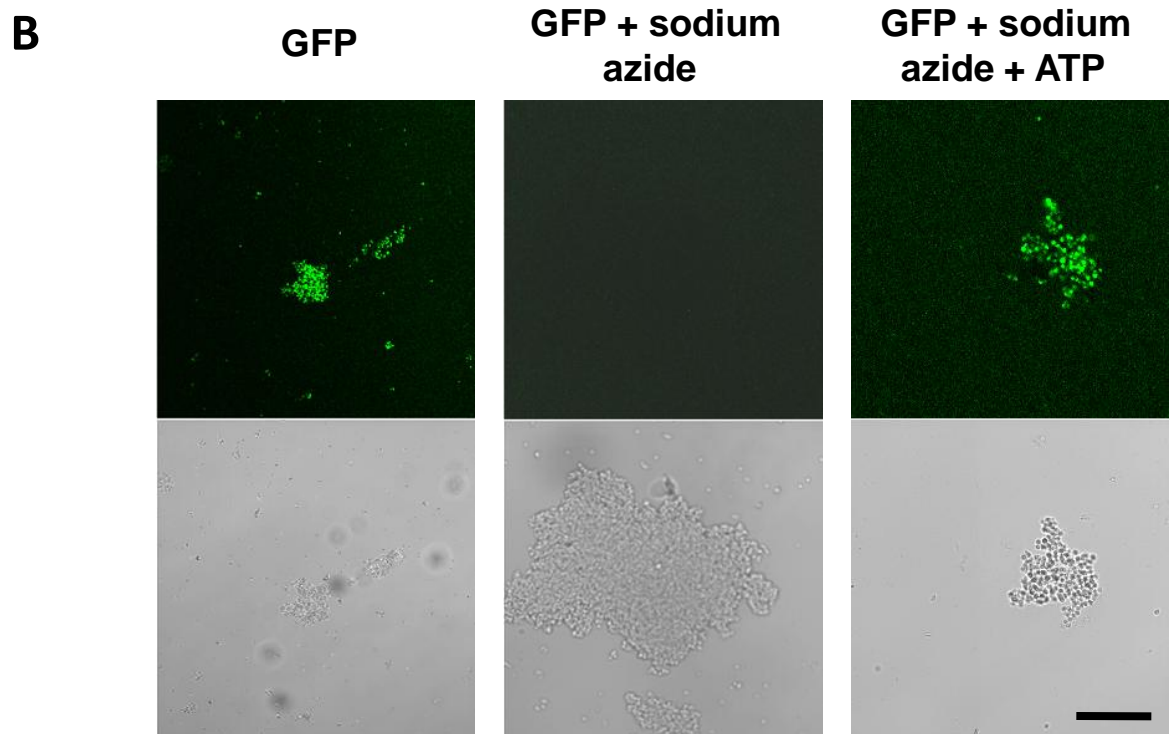

Figure S1

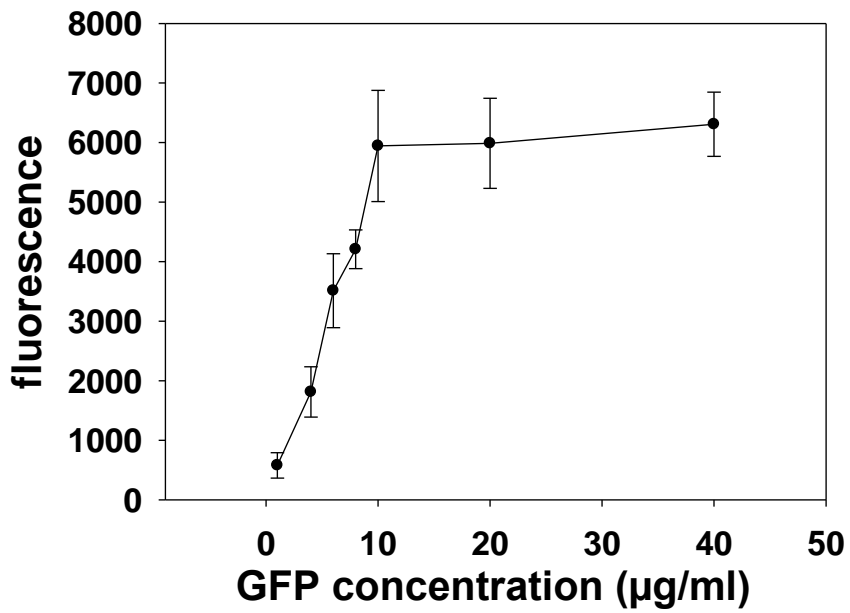

Figure S2

IgG-Cy3:GFP  
1:20

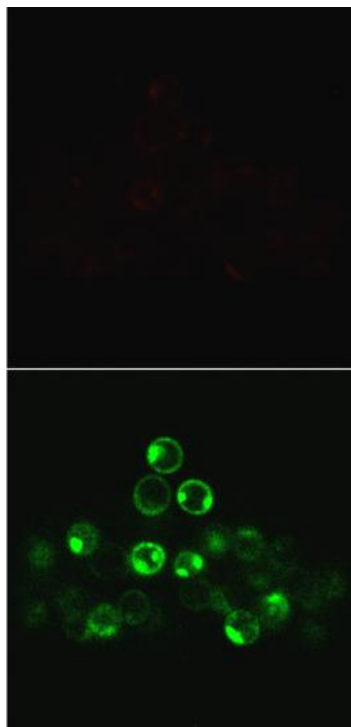

IgG-Cy3:GFP  
20:1

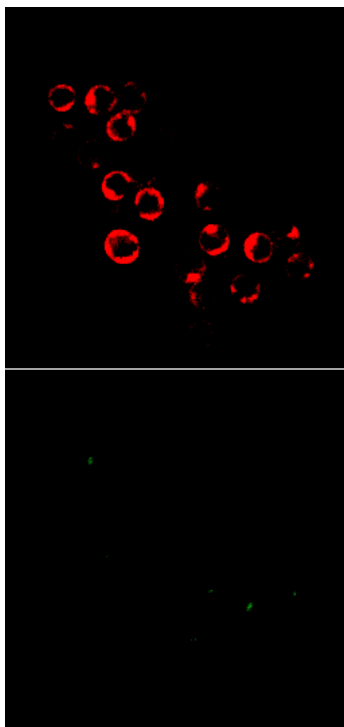

IgG-Cy3:GFP  
1:1

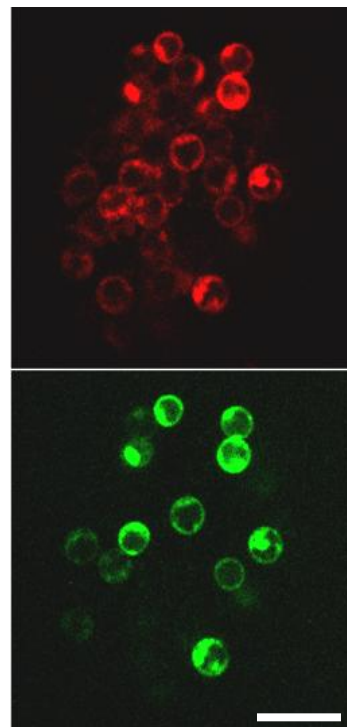

Figure S3

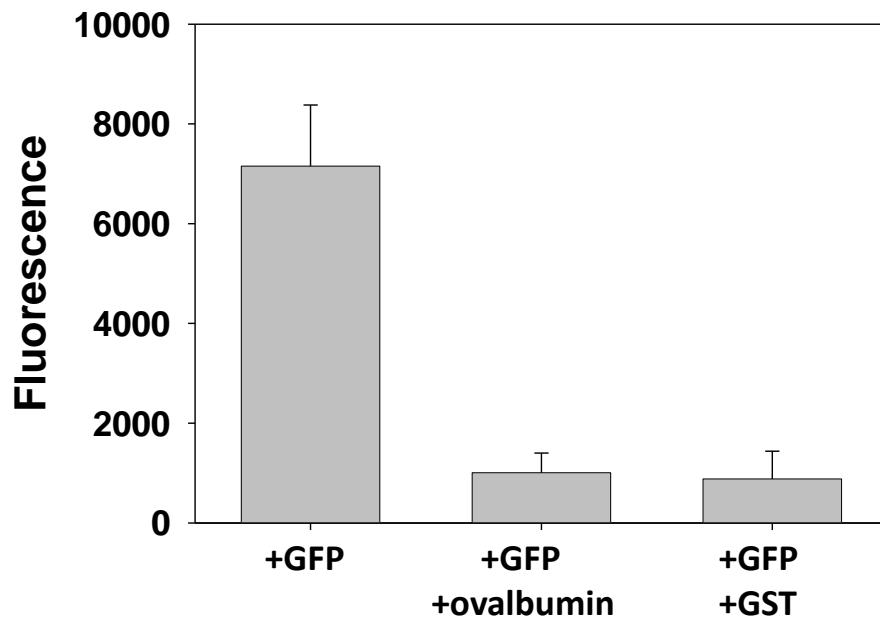

Figure S4

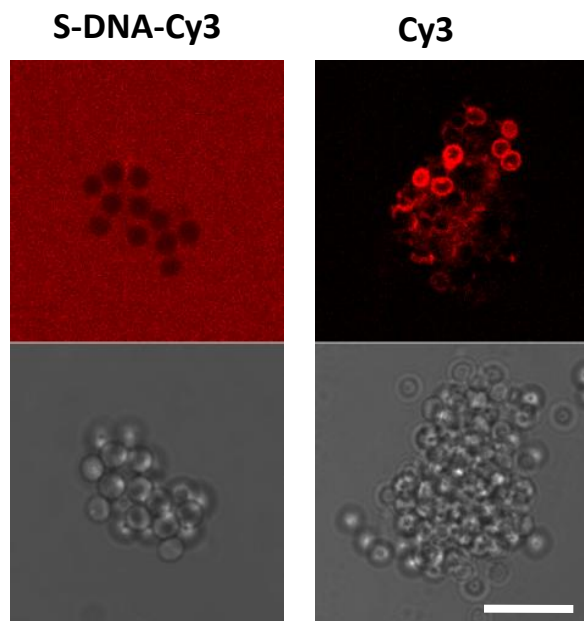

**Figure S5**

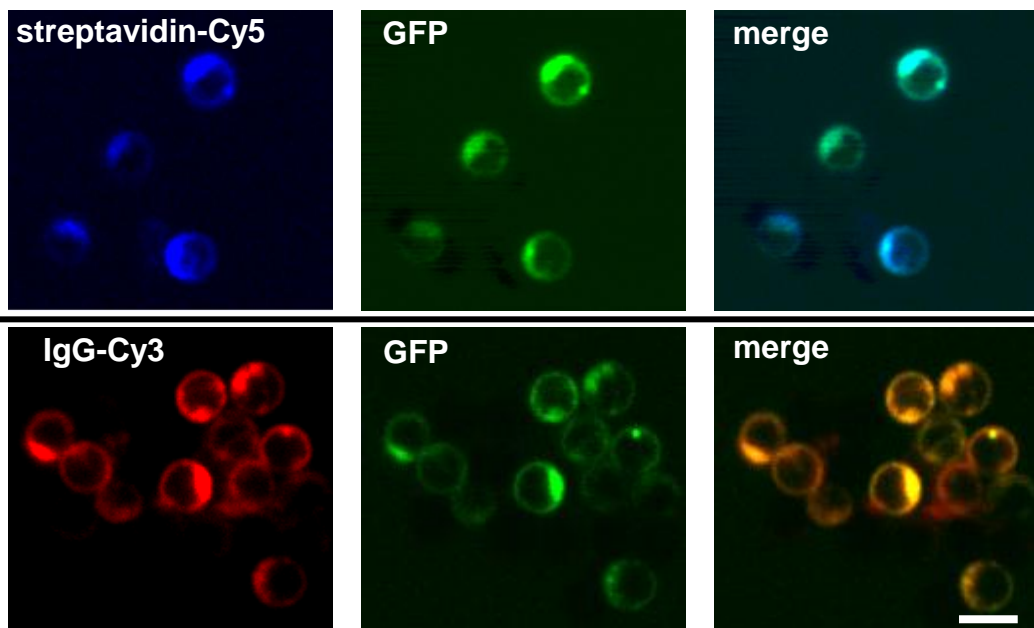

Figure S6

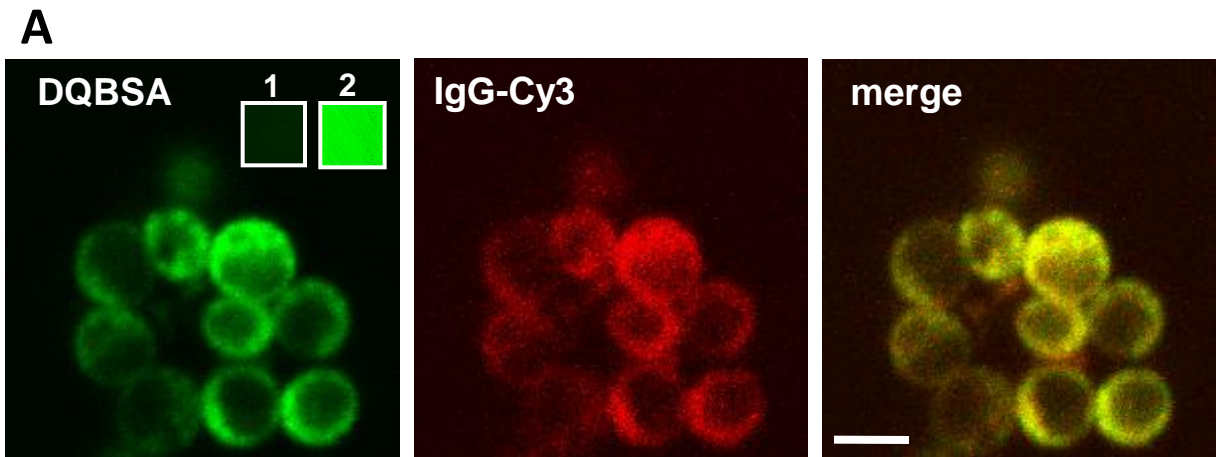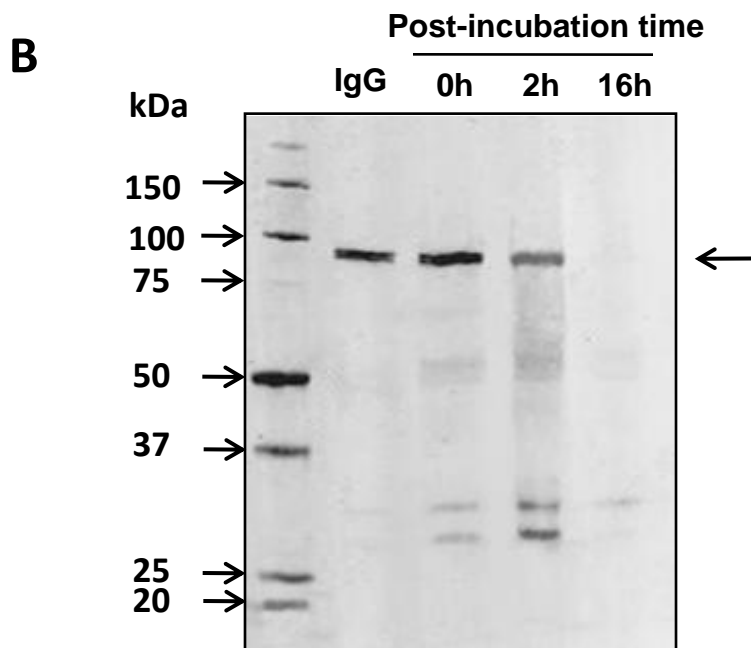

Figure S7



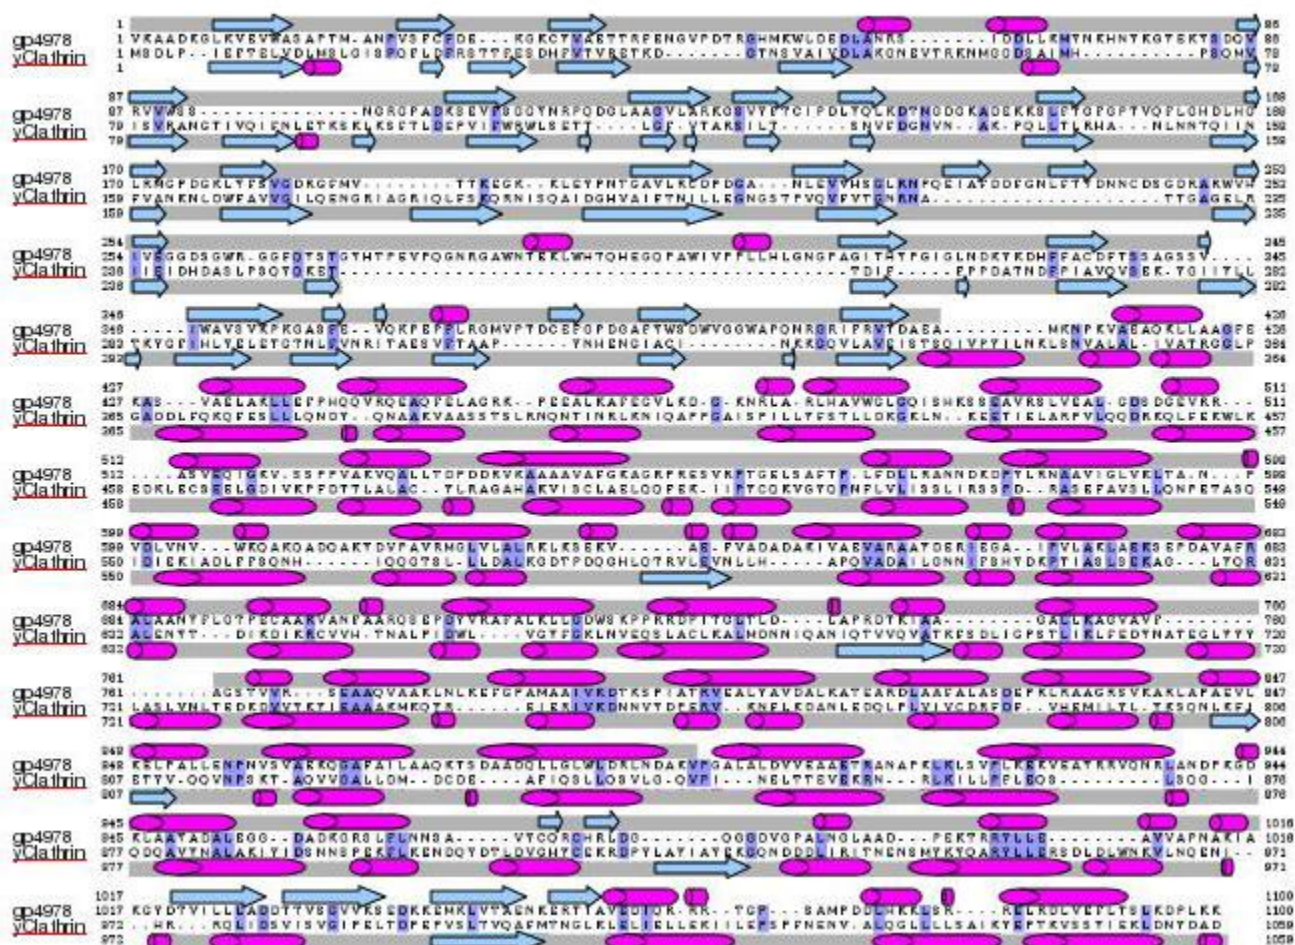

Figure S8



**A**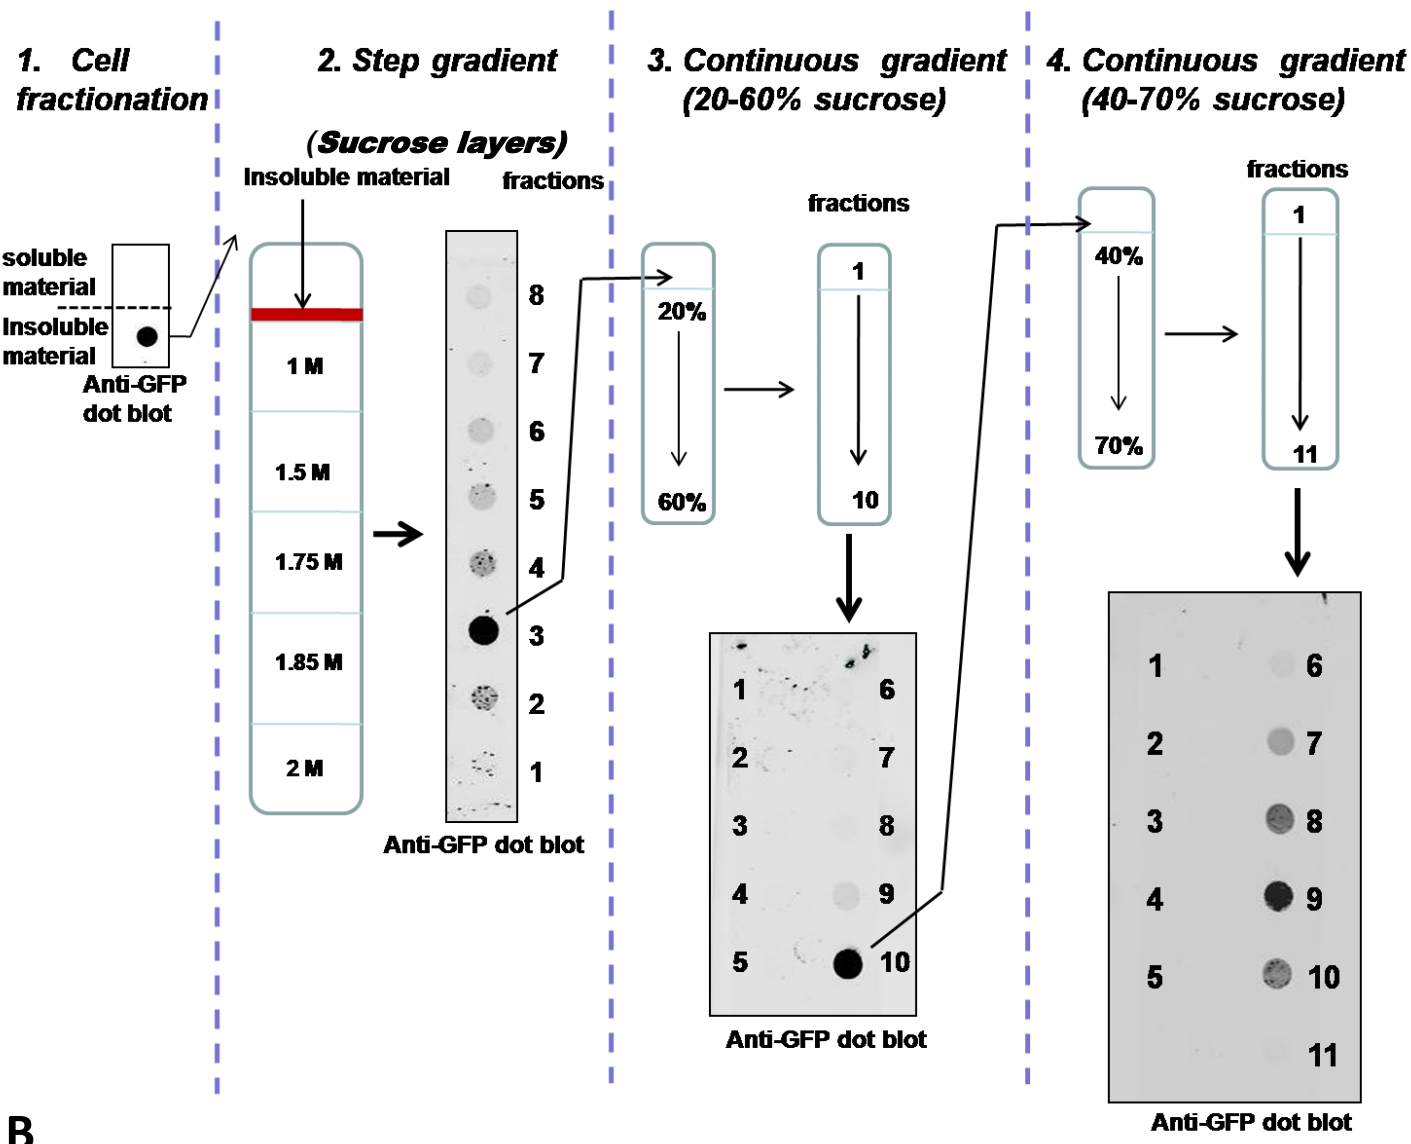**B**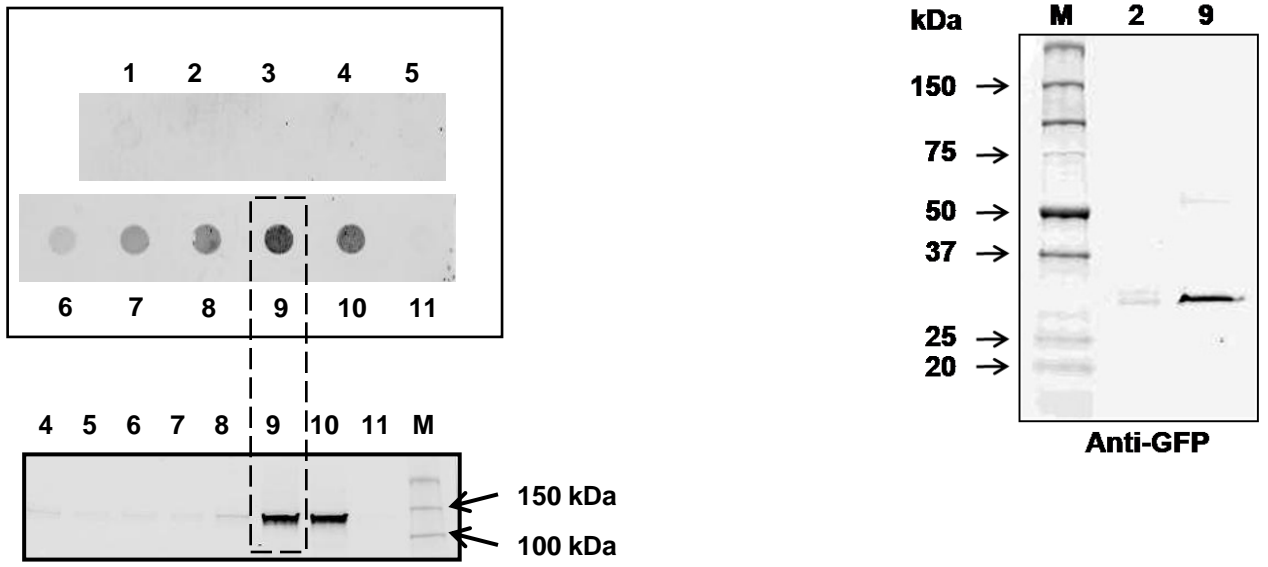**Figure S9**

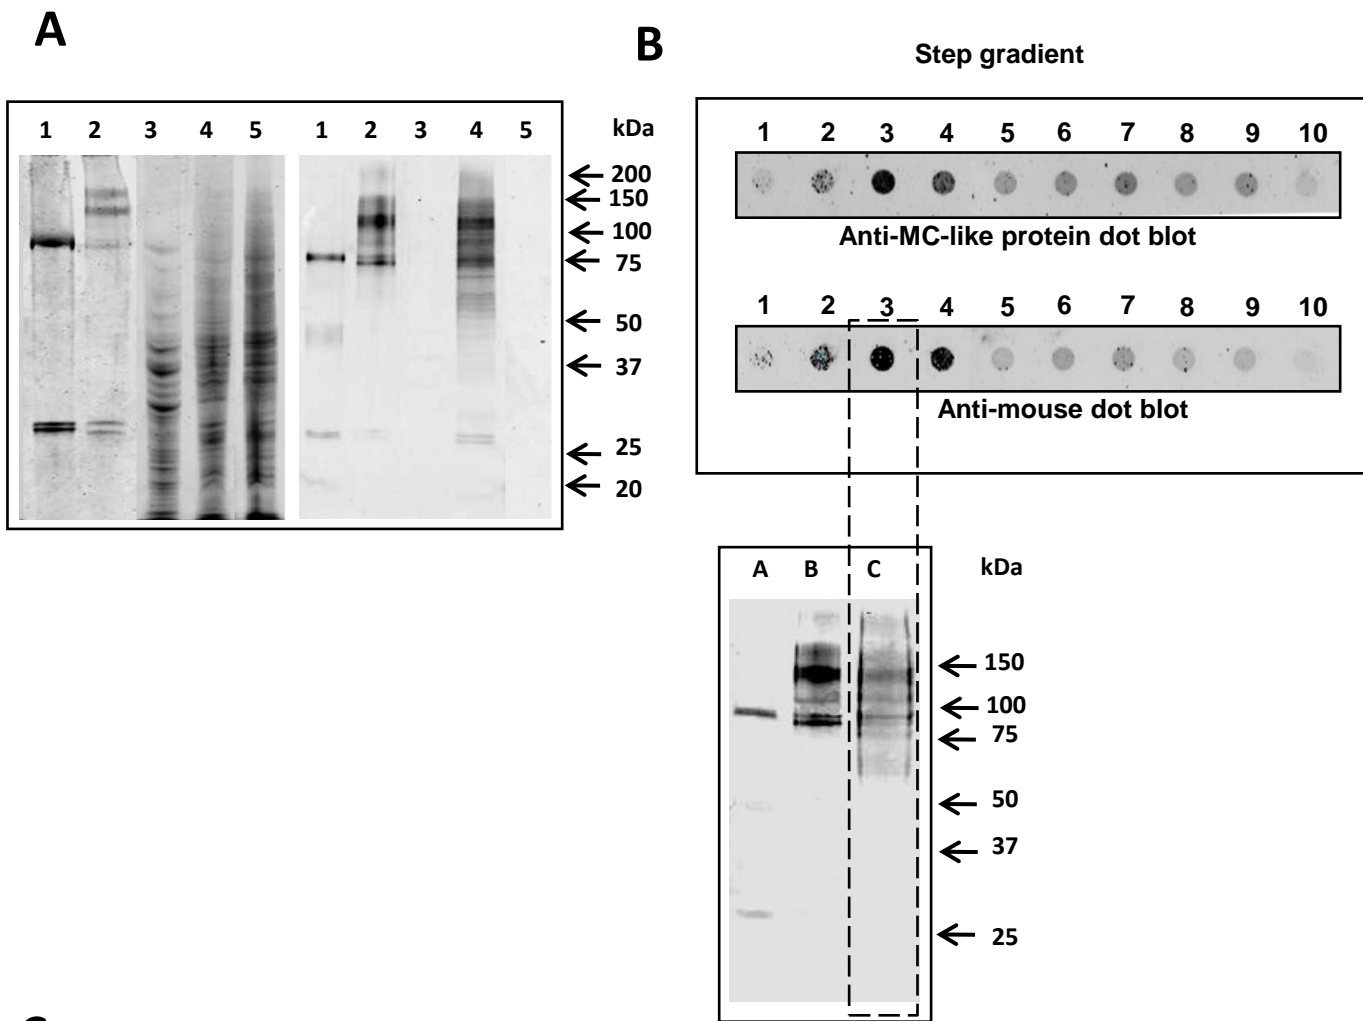

Figure S10

**A**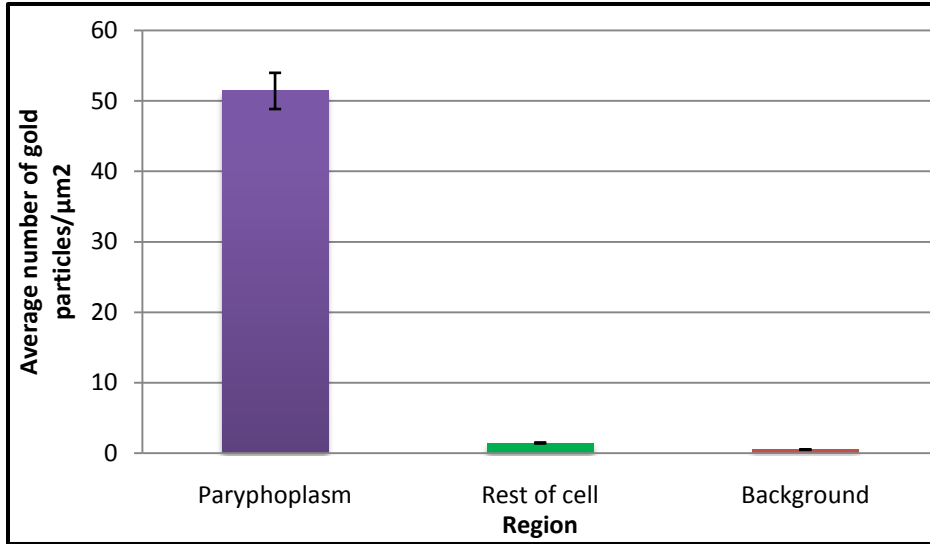**B**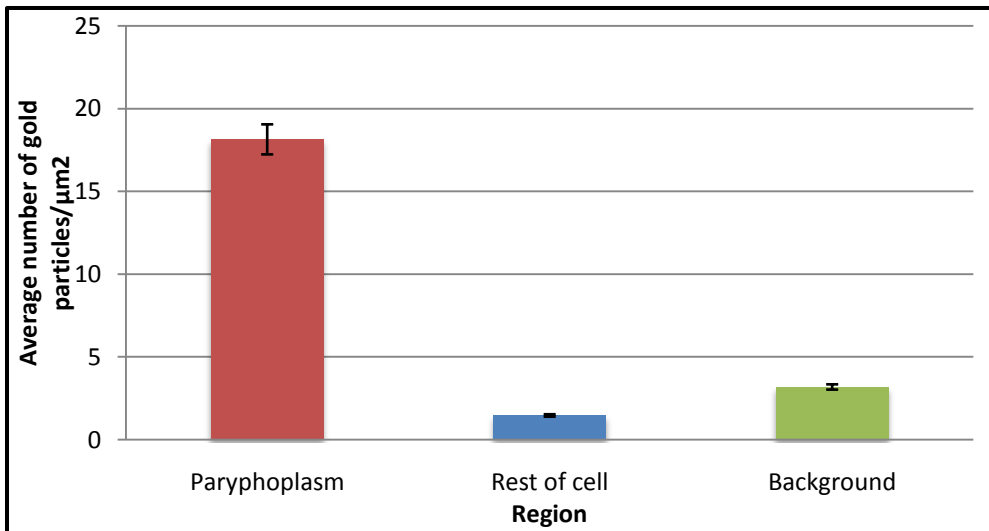**Figure S11**

**Fraction 7 , step gradient**

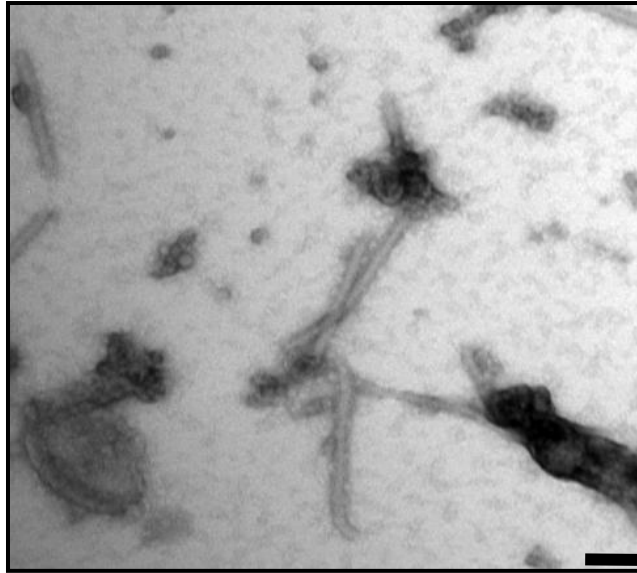

**Fraction 9 , 20%-60%gradient**

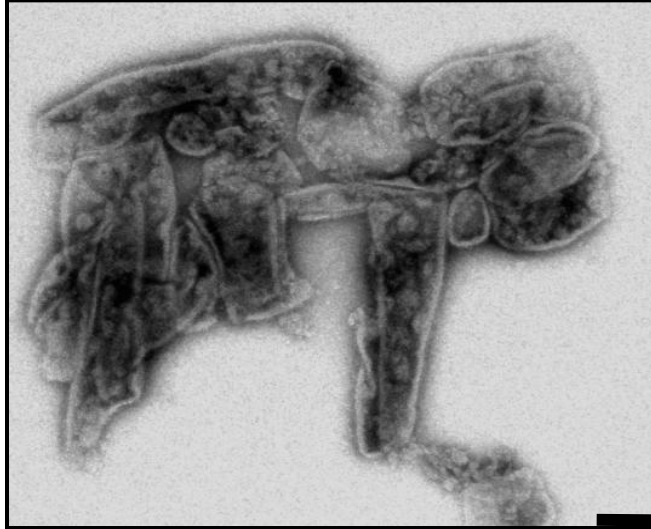

**Fraction 10 , 20%-60%gradient**

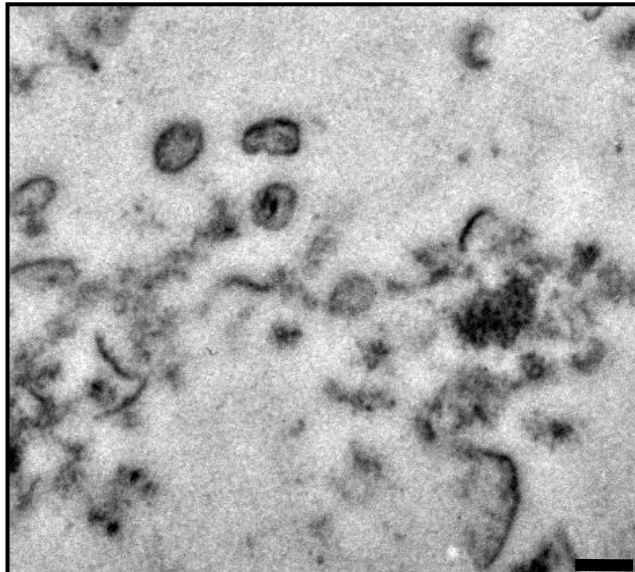

Supplement: 1001085107_sapp.pdf [file 1001085107_sapp.pdf]
